# Supplementary material
Source: PubMed Central journal article supplement (PMC4720166)
Supplement: NIHMS750088-supplement-01.pdf [file NIHMS750088-supplement-01.pdf]

**Table E1. Receptors Status and Systemic Treatment History**

|                              | Patient No. | %    |
|------------------------------|-------------|------|
| <b>Histology<sup>#</sup></b> |             |      |
| ER/PR Positive               | 46          | 83.6 |
| ER/PR Negative               | 9           | 16.4 |
| Her2/ErbB2 Positive          | 18          | 32.7 |
| Her2/ErbB2 Negative          | 37          | 67.3 |
| Triple Negative              | 5           | 9.1  |
| <b>Medications*</b>          |             |      |
| Chemotherapeutics            |             |      |
| Anthracyclines               | 36          | 48   |
| Taxanes                      | 55          | 73.3 |
| Vinca Alkaloids              | 27          | 36   |
| Cyclophosphamide             | 27          | 36   |
| Gemcitabine                  | 18          | 24   |
| Capecitabine                 | 39          | 52.0 |
| 5FU                          | 7           | 9.3  |
| Platins                      | 10          | 13.3 |
| Ixabepilone                  | 5           | 6.7  |
| Eribulin                     | 3           | 4    |
| Biologics                    |             |      |
| Trastuzumab                  | 18          | 24   |
| Lapatinib                    | 5           | 6.7  |
| Bevacizumab                  | 15          | 20.0 |
| Hormonals                    |             |      |
| Tamoxifen                    | 24          | 32.0 |
| Fulvestrant                  | 13          | 17.3 |
| Aromatase inhibitors         | 28          | 37.3 |
| Leuprolide                   | 2           | 2.7  |
| Goserelin                    | 5           | 6.7  |
| Zoledronate                  | 13          | 17.3 |

\*Note.—At least one patient was treated with etoposide, kadcyła, dasatinib, cetuximab, denosumab, irinotecan, premetrexed, cyclosporine, everolimus, methotrexate (n=2).

ER, estrogen receptor; PR, progesterone receptor; 5FU, fluorouracil.

<sup>#</sup>Receptors status missing or unknown in n = 20 cases.

**Table E2. Radiologic Response**

| RECIST     | <b>CR</b> |   | <b>PR</b> |      | <b>SD</b> |      | <b>PD</b> |     | <b>ORR</b> |      |
|------------|-----------|---|-----------|------|-----------|------|-----------|-----|------------|------|
|            | No.       | % | No.       | %    | No.       | %    | No.       | %   | No.        | %    |
| By Patient | 0         | 0 | 24        | 35.3 | 43        | 63.2 | 1         | 1.5 | 56         | 82.4 |
| By Lesion  | 0         | 0 | 36        | 34.6 | 63        | 60.6 | 5         | 4.8 | 82         | 78.8 |

Note.—Values expressed as incidence and percent.  
 CR, Complete Response; ORR, Overall Response Rate; PD, Progressive Disease; PR, Partial Response; RECIST, Response Evaluation Criteria In Solid Tumors; SD, stable disease.

**Table E3. Progressive Disease**

|              | <b>1mo</b>   |           | <b>3mo</b>   |           | <b>6mo</b>   |           | <b>12mo</b>  |           |
|--------------|--------------|-----------|--------------|-----------|--------------|-----------|--------------|-----------|
|              | Estimate (%) | 95% CI    |
| Index Lesion | 3.1          | .78-11.84 | 3.1          | .78-11.84 | 3.1          | .78-11.84 | 10.6         | 2.6-38.2  |
| Hepatic      | 22.7         | 14.1-35.4 | 46.6         | 34.2-60.9 | 54.6         | 41.2-69.1 | 78.2         | 60.9-91.6 |
| Extrahepatic | 20.6         | 12.5-32.9 | 38           | 26.7-52.1 | 61.2         | 46.7-76   | 85.5         | 70.3-95.3 |

Note.—Values expressed as incidence and percent. CI, confidence interval.
